# Supplementary material
Source: PubMed Central journal article supplement (PMC3059079)

A

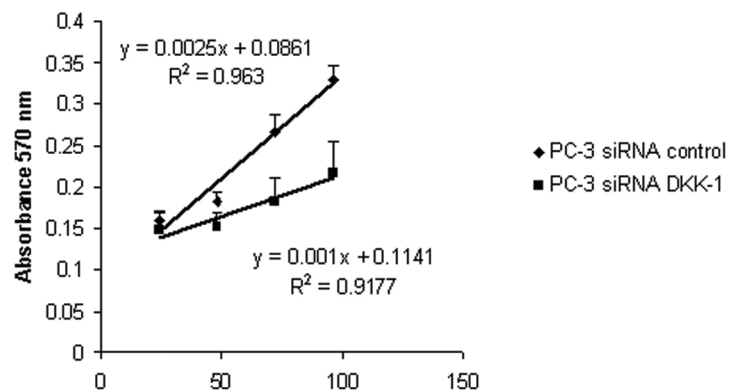

B

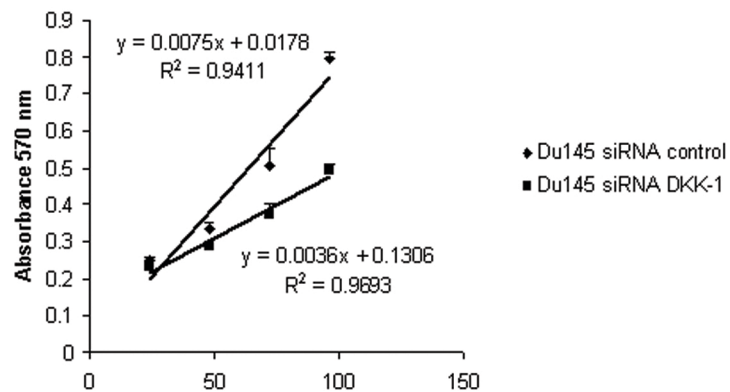

C

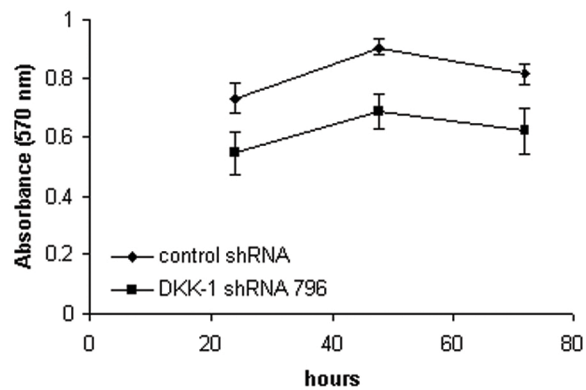

Supplement: NIHMS244830-supplement-2.pdf [file NIHMS244830-supplement-2.pdf]

A

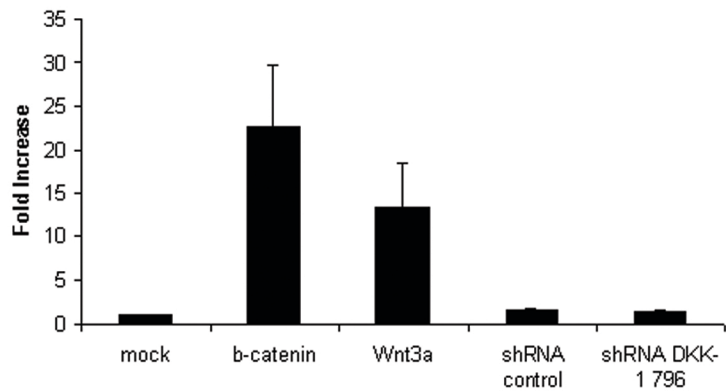

B

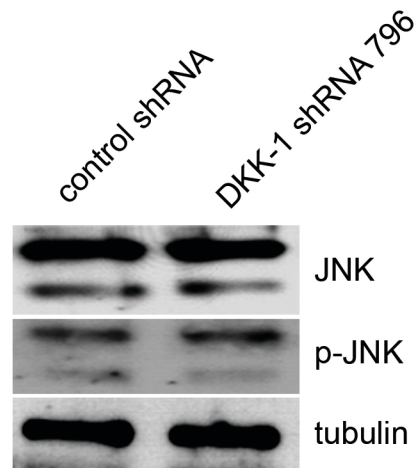

C

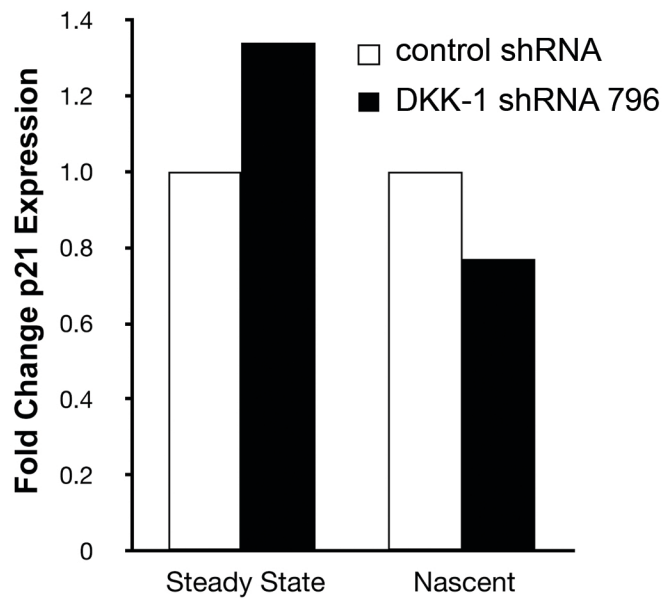

Supplement: NIHMS244830-supplement-3.pdf [file NIHMS244830-supplement-3.pdf]

A

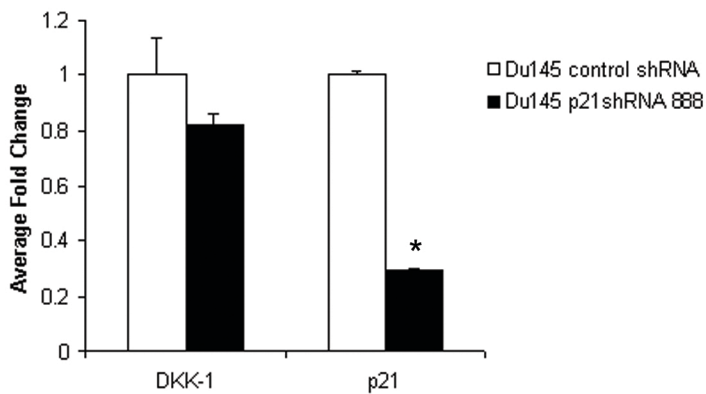

B

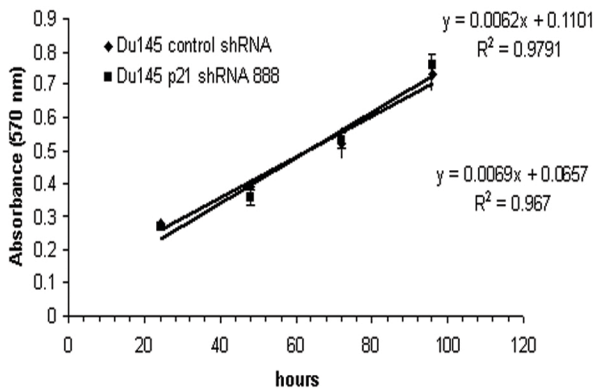

Supplement: NIHMS244830-supplement-4.pdf [file NIHMS244830-supplement-4.pdf]

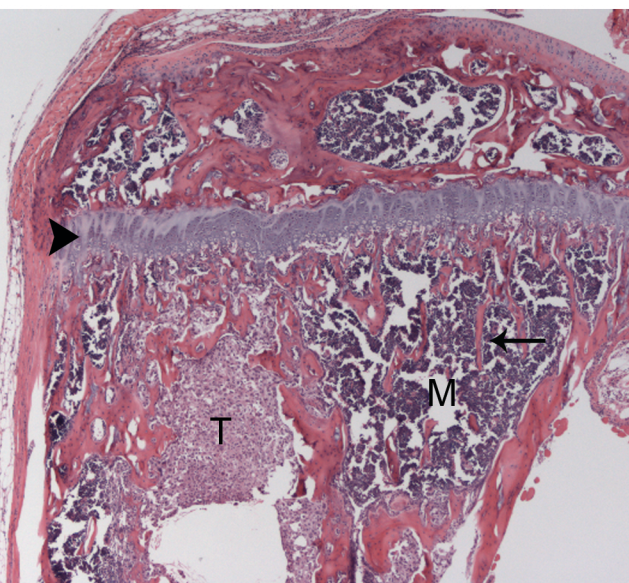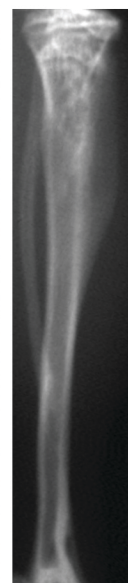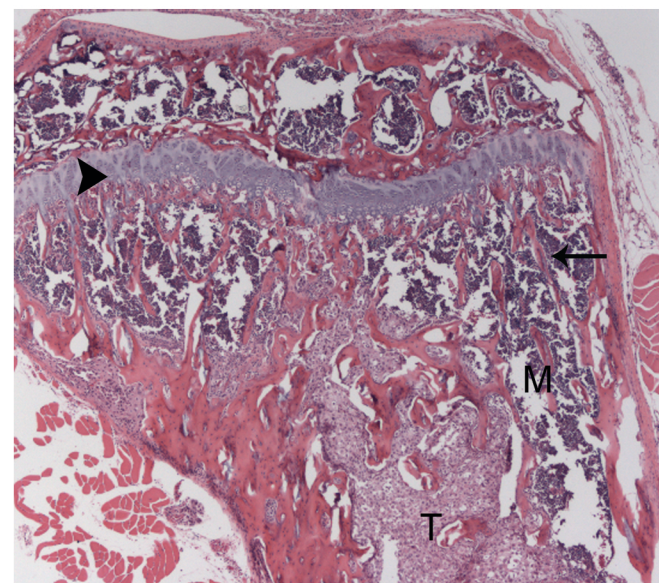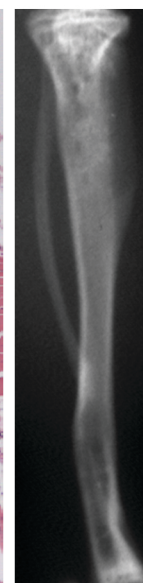

Du145 control shRNA

Du145 p21 shRNA 888

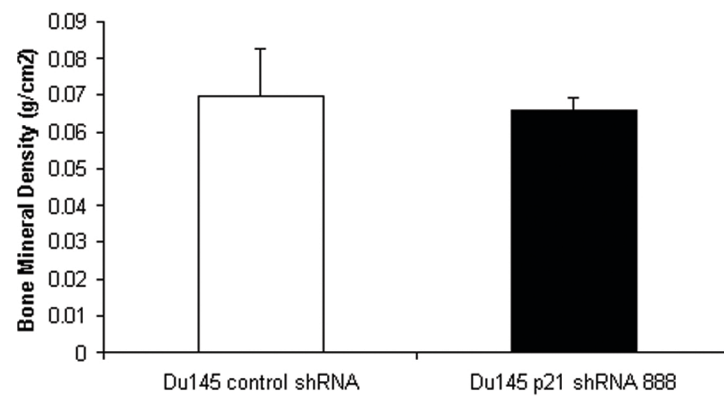

Supplement: NIHMS244830-supplement-5.pdf [file NIHMS244830-supplement-5.pdf]
